# Supplementary material for: A comparison of prenatal and postnatal repair of myelomeningocele: a systematic review and meta- analysis
Source: Research Square preprint supplement (doi:10.21203/rs.3.rs-7216514/v1), 2025-09-03
Supplement: Supplementary file 1 [file 1030bffb3cff1d3aef30ce83.docx]

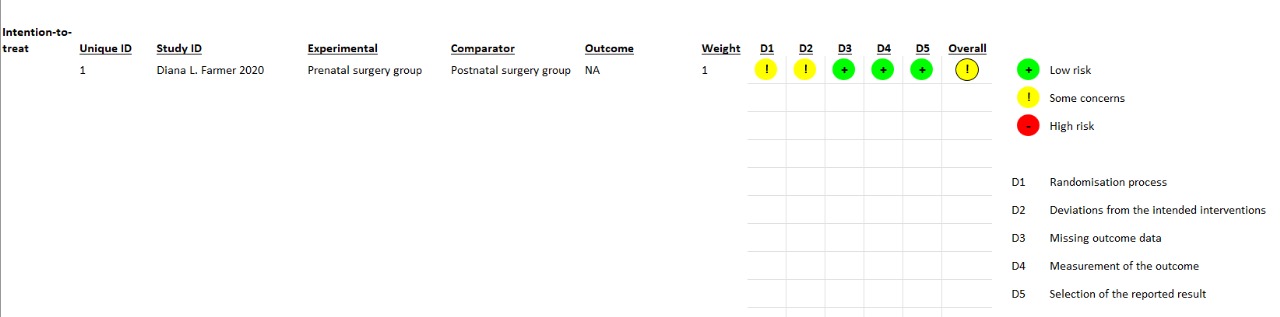


**Supplementary Figure 1: Risk of bias assessment for randomized control trial**

| Study¹ | Selection of cohorts |  |  |  |  | Comparability of cohorts | Outcome |  |  | Power² |
| --- | --- | --- | --- | --- | --- | --- | --- | --- | --- | --- |
|  | **Representativeness of the exposed cohort** | **Selection of the non-exposed cohort** | **Ascertainment of exposure** | **Demonstration that outcome of interest was not present at start of study** |  | **Comparability of cohorts on the basis of the design or analysis** | **Assessment of outcome** | **Was follow up long enough for outcomes to occur** | **Adequacy of follow up of cohorts** |  |
| M. SANZCORTES (2024) | ☆ | ☆ | ☆ | ☆ |  | ☆ | ☆ | ☆ | ☆ | Good quality³ |
| Anita L. Kalluri (2023) | ☆ | ☆ | ☆ | ☆ |  | ☆ | ☆ | ☆ | ☆ | Good Quality |
| Jacek Zamłyński (2013) | ☆ | ☆ | ☆ | ☆ |  | ☆ | ☆ | ☆ | ☆ | Good Quality |

**Note**

¹ To reduce the risk of bias, each article was assessed by an independent judge, and no discrepancies were found between both reviewers.

² **Good quality**: 3 or 4 stars in selection domain AND 1 or 2 stars in comparability domain AND 2 or 3 stars in outcome/exposure domain
**Fair quality**: 2 stars in selection domain AND 1 or 2 stars in comparability domain AND 2 or 3 stars in outcome/exposure domain
**Poor quality**: 0 or 1 star in selection domain OR 0 stars in comparability domain OR 0 or 1 stars in outcome/exposure domain

³ **Low risk of bias** = *Good and fair quality* // **High risk of bias** = *Poor quality*

**From**: Wells, G., Shea, B., O’Connell, D., Peterson, J., Welch, V., **Losos**, M., & Tugwell, P. (2014). Newcastle-Ottawa quality assessment scale cohort studies. University of Ottawa.

**Supplementary Table 1: Quality assessment for observational studies**

| **Summary of findings:** | | | | | | |
| --- | --- | --- | --- | --- | --- | --- |
| **Prenatal repair compared to Postnatal repair for Myelomeningocele** | | | | | | |
|  | | | | | | |
| **Patient or population:** Myelomeningocele  **Setting:**  **Intervention:** Prenatal repair  **Comparison:** Postnatal repair | | | | | | |
| Outcomes | **Anticipated absolute effects*** (95% CI) | | Relative effect (95% CI) | № of participants (studies) | Certainty of the evidence (GRADE) | Comments |
| **Risk with Postnatal repair** | **Risk with Prenatal repair** |
| Walking independently | 182 per 1,000 | **425 per 1,000** (277 to 647) | **RR 2.33** (1.52 to 3.55) | 374 (3 non-randomised studies) | ⨁⨁⨁◯ Moderatea,b,c | Prenatal repair likely results in a large increase in walking independently. |
| Mortality | 32 per 1,000 | **45 per 1,000** (16 to 130) | **RR 1.44** (0.50 to 4.13) | 499 (4 non-randomised studies) | ⨁⨁◯◯ Lowd,e | Prenatal repair may result in a large increase in mortality. |
| Motor function | 169 per 1,000 | **413 per 1,000** (290 to 585) | **RR 2.45** (1.72 to 3.47) | 380 (3 non-randomised studies) | ⨁⨁⨁◯ Moderatef | Prenatal repair probably results in a large increase in motor function. |
| VP shunt | 529 per 1,000 | **275 per 1,000** (137 to 539) | **RR 0.52** (0.26 to 1.02) | 291 (3 non-randomised studies) | ⨁◯◯◯ Very lowg,h | Prenatal repair may reduce/have little to no effect on VP shunt but the evidence is very uncertain. |
| ***The risk in the intervention group** (and its 95% confidence interval) is based on the assumed risk in the comparison group and the **relative effect** of the intervention (and its 95% CI).  **CI:** confidence interval; **RR:** risk ratio | | | | | | |
| **GRADE Working Group grades of evidence** **High certainty:** we are very confident that the true effect lies close to that of the estimate of the effect. **Moderate certainty:** we are moderately confident in the effect estimate: the true effect is likely to be close to the estimate of the effect, but there is a possibility that it is substantially different. **Low certainty:** our confidence in the effect estimate is limited: the true effect may be substantially different from the estimate of the effect. **Very low certainty:** we have very little confidence in the effect estimate: the true effect is likely to be substantially different from the estimate of effect. | | | | | | |

#### Explanations

a. Low heterogeneity (I² = 13%, p = 0.32), meaning the results are consistent across studies.

b. Population, intervention, and outcome all directly address the clinical question.

c. The pooled effect (RR = 2.33 [1.52–3.55]) has a narrow confidence interval that does not cross 1.

d. Low heterogeneity: I² = 1%, Tau² = 0.01, P = 0.39.

e. Wide 95% CIs across studies (e.g., [0.05, 4.48] and [0.47, 135.37]), with few total events (22 deaths); overall RR = 1.44 [0.50, 4.13] is very imprecise.

f. Very low heterogeneity (I² = 0%, Chi² p = 0.96); consistent direction and magnitude of effect.

g. Substantial heterogeneity: I² = 69%, Tau² = 0.25, P = 0.04. Effect sizes range widely (RR 0.35 to 0.82).

h. 95% CIs for pooled effect cross null (RR=1) and are wide (e.g., 0.13-0.94). Total events = 112, but optimal information size not met.

**Supplementary Table 2: Uncertainty of evidence**
